# Supplementary material for: Electroplated porous polypyrrole nanostructures patterned by colloidal lithography for drug-delivery applications
Source: Royal Society of Chemistry journal article supplement (doi:10.1039/c2nr30192j), 2012-01-01
Supplement: c2nr30192j.pdf [file c2nr30192j.pdf]

## Electronic Supplementary Information:

# Electroplated porous polypyrrole nanostructures patterned by colloidal lithography for drug-delivery applications<sup>†</sup>

J. Pokki,<sup>a</sup> O. Ergeneman,<sup>\*a</sup> K. M. Sivaraman,<sup>a</sup> B. Özkale,<sup>a</sup> M. A. Zeeshan,<sup>a</sup> T. Lühmann,<sup>b</sup>  
B. J. Nelson,<sup>a</sup> and S. Pané<sup>a</sup>

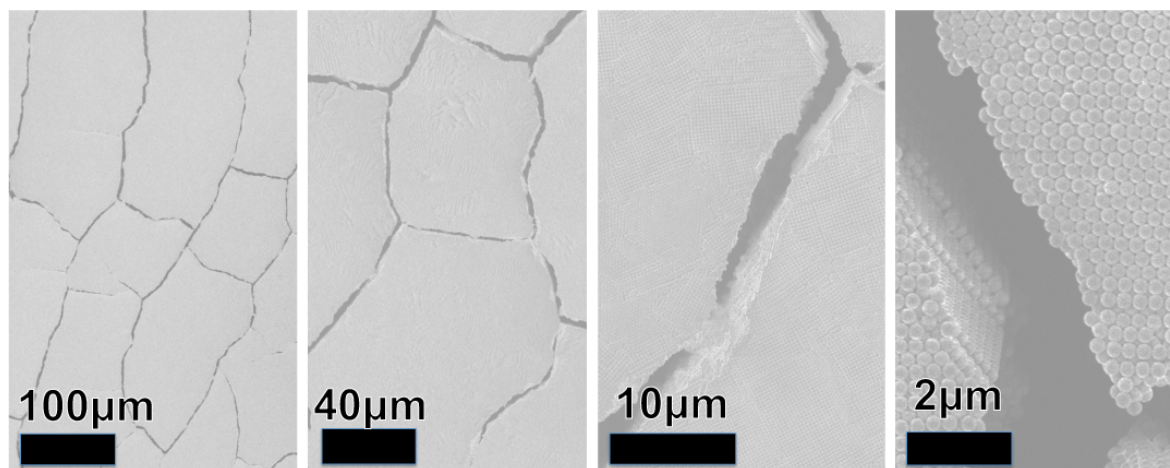

Fig. S1 Colloidal layer defects occurred roughly every 100 μm.

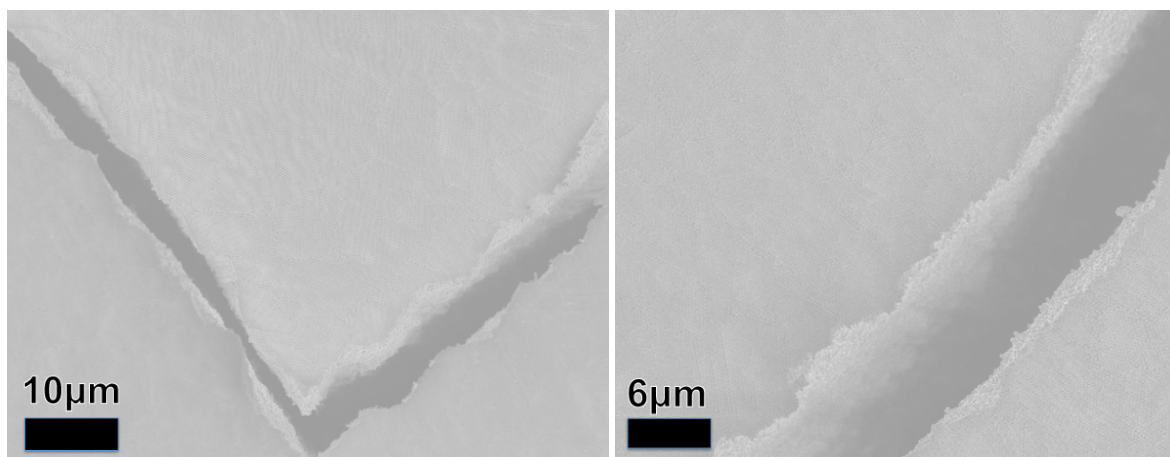

(a) Defects of  $\leq 10 \mu\text{m}$  in width.

(b) A defect of  $\approx 10 \mu\text{m}$  in width..

Fig. S2 Colloidal layer defects of different size.

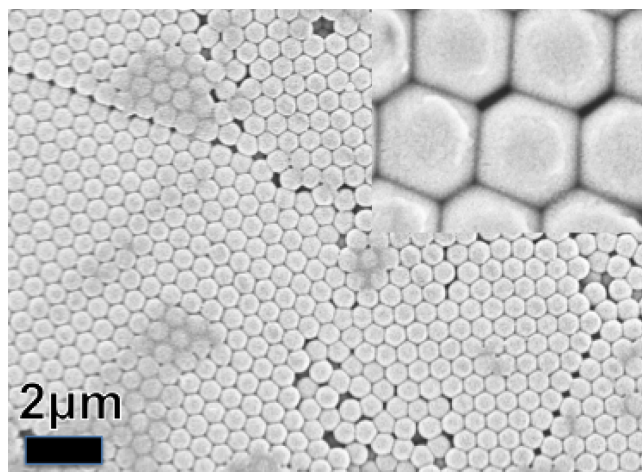

**Fig. S3** PS nanospheres interconnected after heat treatment.

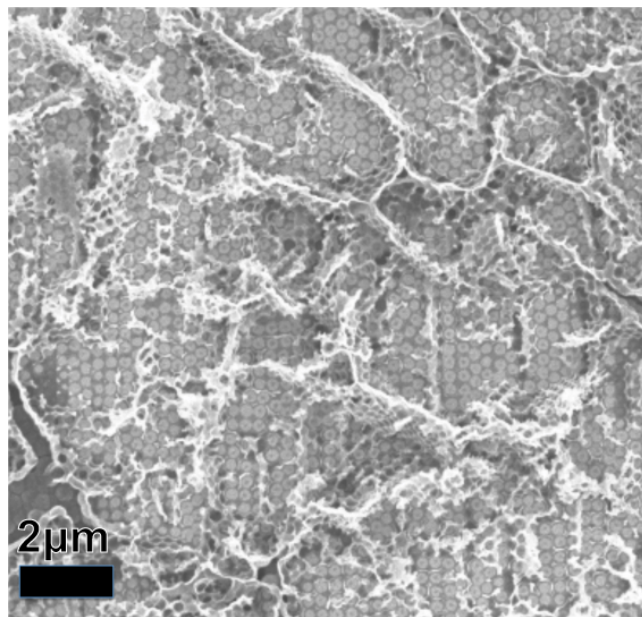

**Fig. S4** Honeycomb type B after excessive heat treatment.
